# Supplementary material
Source: PubMed Central journal article supplement (PMC4101061)
Supplement: NIHMS597715-supplement-01.pdf [file NIHMS597715-supplement-01.pdf]

## Supplemental Data

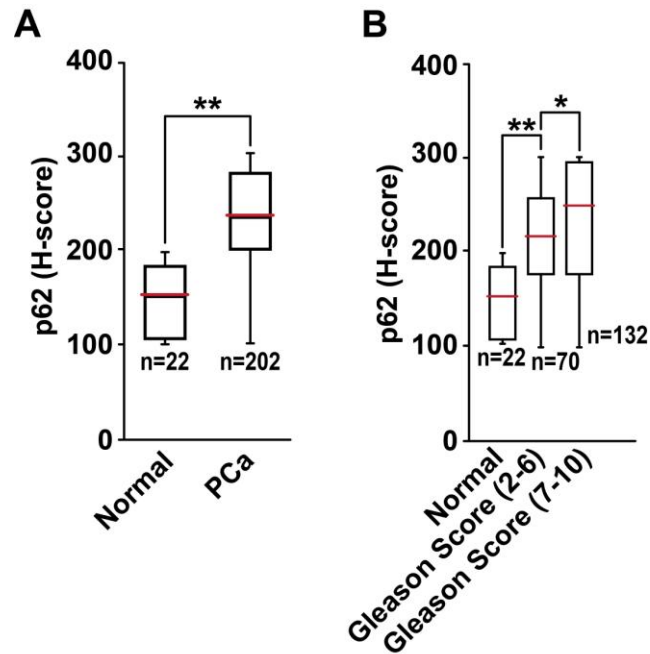

**Figure S1, related to Figure 1. p62 is overexpressed in the epithelium of human prostate tumors.**

(A) p62 levels are increased in the epithelium of primary PCa tumors as compared to normal samples, and (B) are upregulated upon PCa progression. Analysis of TMA of Figure 1A. The H-score, the staining intensity of p62 in epithelium x the proportion of cells with the observed intensity, was used to grade p62 expression levels in each sample. Students t test (\*p < 0.05, \*\*p < 0.01).

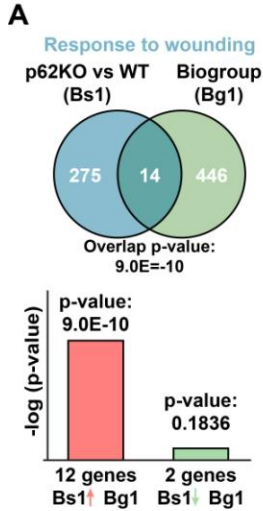

**B**

Gene sets enriched in phenotype p62 KO- Analysis with C5 database of MSigDB v. 3.1

| RANK | MSigDB                                                            | Size | ES   | NES  | NOM p-val | FDR q-val | FWER p-val |
|------|-------------------------------------------------------------------|------|------|------|-----------|-----------|------------|
| 1    | GENERATION_OF_A_SIGNAL_INVOLVED_IN_CELL_CELL_SIGNALING            | 26   | 0.61 | 1.85 | 0.001     | 0.222     | 0.247      |
| 2    | G_PROTEIN_SIGNALING_COUPLED_TO_CYCLIC_NUCLEOTIDE_SECOND_MESSENGER | 95   | 0.46 | 1.82 | 0         | 0.166     | 0.344      |
| 3    | CYCLIC_NUCLEOTIDE_MEDIATED_SIGNALING                              | 97   | 0.46 | 1.78 | 0         | 0.181     | 0.499      |
| 4    | HUMORAL_IMMUNE_RESPONSE                                           | 29   | 0.56 | 1.75 | 0.006     | 0.182     | 0.599      |
| 5    | HORMONE_SECRETION                                                 | 16   | 0.64 | 1.74 | 0.006     | 0.172     | 0.664      |
| 6    | RESPONSE_TO_WOUNDING                                              | 171  | 0.41 | 1.73 | 0         | 0.15      | 0.685      |
| 7    | DETECTION_OF_ABIOTIC_STIMULUS                                     | 19   | 0.61 | 1.73 | 0.007     | 0.137     | 0.708      |
| 8    | CELL_CELL_SIGNALING                                               | 364  | 0.38 | 1.72 | 0         | 0.132     | 0.746      |
| 9    | RESPONSE_TO_EXTERNAL_STIMULUS                                     | 274  | 0.38 | 1.71 | 0         | 0.125     | 0.771      |
| 10   | NEGATIVE_REGULATION_OF_MULTICELLULAR_ORGANISMAL_PROCESS           | 27   | 0.55 | 1.69 | 0.008     | 0.14      | 0.838      |
| 11   | SECOND_MESSENGER_MEDIATED_SIGNALING                               | 141  | 0.41 | 1.69 | 0         | 0.137     | 0.861      |
| 12   | NEUROLOGICAL_SYSTEM_PROCESS                                       | 343  | 0.37 | 1.68 | 0         | 0.135     | 0.876      |
| 13   | INFLAMMATORY_RESPONSE                                             | 113  | 0.41 | 1.65 | 0.001     | 0.172     | 0.944      |
| 14   | DETECTION_OF_STIMULUS                                             | 41   | 0.49 | 1.65 | 0.006     | 0.16      | 0.945      |
| 15   | ECTODERM_DEVELOPMENT                                              | 69   | 0.44 | 1.65 | 0.004     | 0.15      | 0.945      |
| 16   | POTASSIUM_ION_TRANSPORT                                           | 56   | 0.46 | 1.64 | 0.004     | 0.147     | 0.953      |
| 17   | REGULATION_OF_MULTICELLULAR_ORGANISMAL_PROCESS                    | 129  | 0.4  | 1.64 | 0.001     | 0.146     | 0.959      |
| 18   | DEFENSE_RESPONSE                                                  | 209  | 0.38 | 1.64 | 0.001     | 0.139     | 0.96       |
| 19   | G_PROTEIN_SIGNALING_COUPLED_TO_CAMP_NUCLEOTIDE_SECOND_MESSENGER   | 60   | 0.45 | 1.63 | 0.009     | 0.136     | 0.964      |
| 20   | SYNAPTIC_TRANSMISSION                                             | 162  | 0.38 | 1.62 | 0.001     | 0.141     | 0.975      |

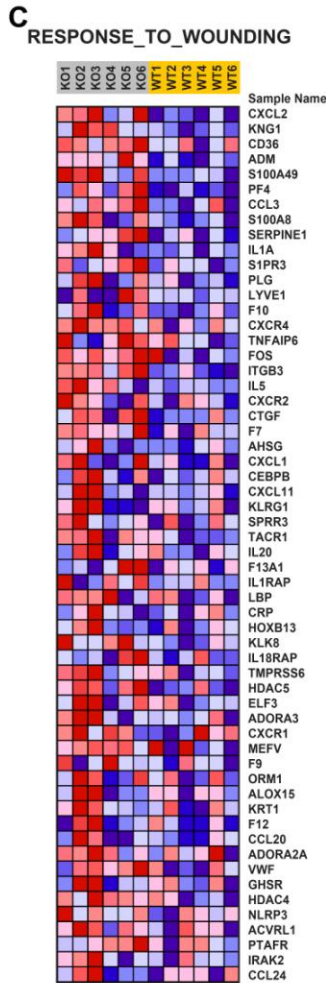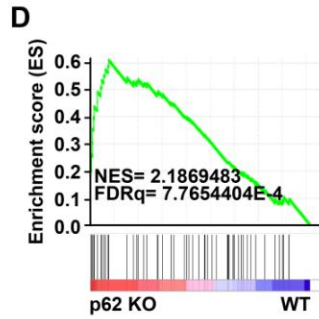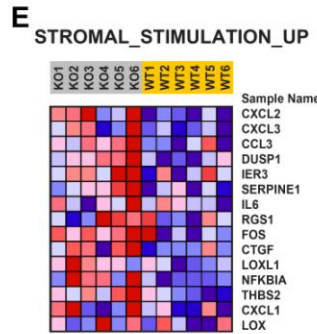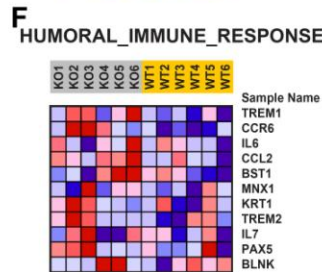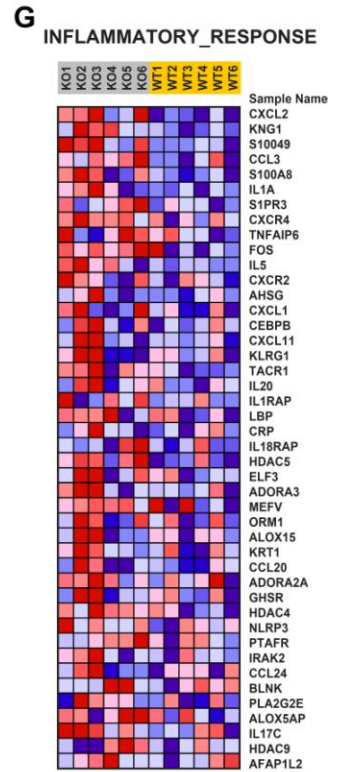

**Figure S2, related to Figure 2. p62 deficiency in the stroma promotes a CAF and an inflammatory phenotype.**

(A) Genes differentially expressed between orthotopic tumors from WT and p62 KO mice were subjected to NextBio analysis to identify biosets that contain similar genes. Venn diagrams show the number of common and unique genes in both sets. (B and C) Differentially expressed genes in orthotopic tumors from p62 KO mice analyzed by GSEA against C5 biological processes of the MSigDB database. (B) The top-ranked twenty gene sets enriched in p62 KO tumors are shown. (C) Leading edge genes of the “response to wounding” gene set. (D and E) Differentially expressed genes in orthotopic tumors from p62 KO mice analyzed by GSEA against C2 curated gene sets of the MSigDB database. (D) GSEA plot of the selected “stromal stimulation” gene set. (E) Leading edge genes of gene set of D. (F and G) Leading edge genes of selected gene sets enriched in p62 KO tumors from analysis shown in (B).

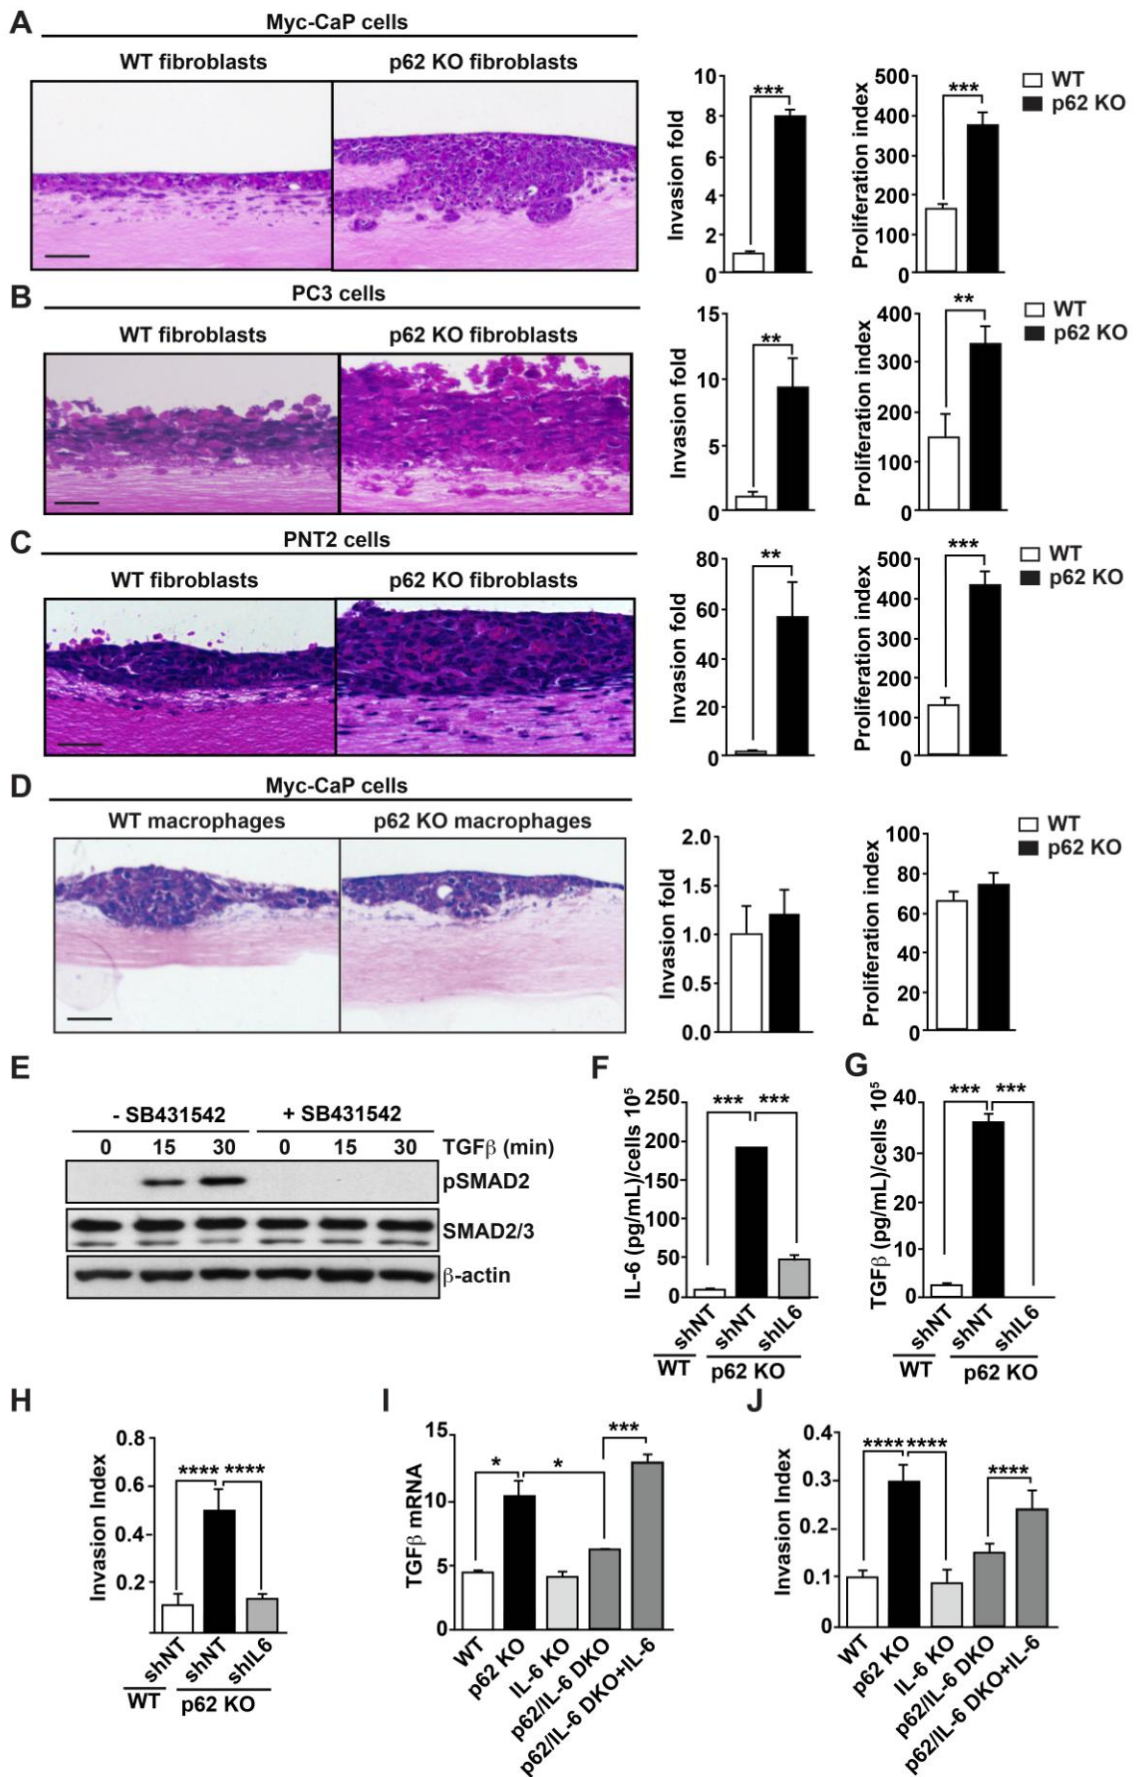

**Figure S3, related to Figure 3. Loss of p62 in the prostate stroma promotes tumorigenesis in the prostate epithelium.**

(A-C) H&E-stained organotypic cultures of different type of PCa cells: Myc-CaP (A), PC3 (B) and PNT2 (C) combined with fibroblasts from WT and p62 KO mice. Right panels show quantification of PCa cell invasion and proliferation of the organotypic experiments. (D) H&E-stained organotypic cultures of Myc-CaP cells with macrophages from WT and p62 KO mice. Right panels show quantification of PCa cell invasion and proliferation of the organotypic experiments. (E) The TGF $\beta$  inhibitor SB431542 effectively blocks TGF $\beta$  signaling as determined by immunoblot with pSMAD2. (F-H) Selective knockdown of IL-6 in p62 KO fibroblasts reverted increased IL-6 (F) and TGF $\beta$  production as determined by ELISA, as well as PCa invasion as determined by modified Boyden chamber assay (H). (I) Addition of IL-6 to p62/IL-6 DKO fibroblasts restored TGF $\beta$  levels. IL-6 was added for 48 hr and TGF $\beta$  levels were determined by RT-PCR. (J) PCa invasion determined by modified Boyden chamber assay in fibroblasts from the different genotypes. IL-6 was exogenously added to p62/IL-6 DKO fibroblasts. Data are means  $\pm$  SEM (n = 4). \*p < 0.05, \*\*p < 0.01. \*\*\*p < 0.001, \*\*\*\*p < 0.0001. Scale bars, 100  $\mu$ m.

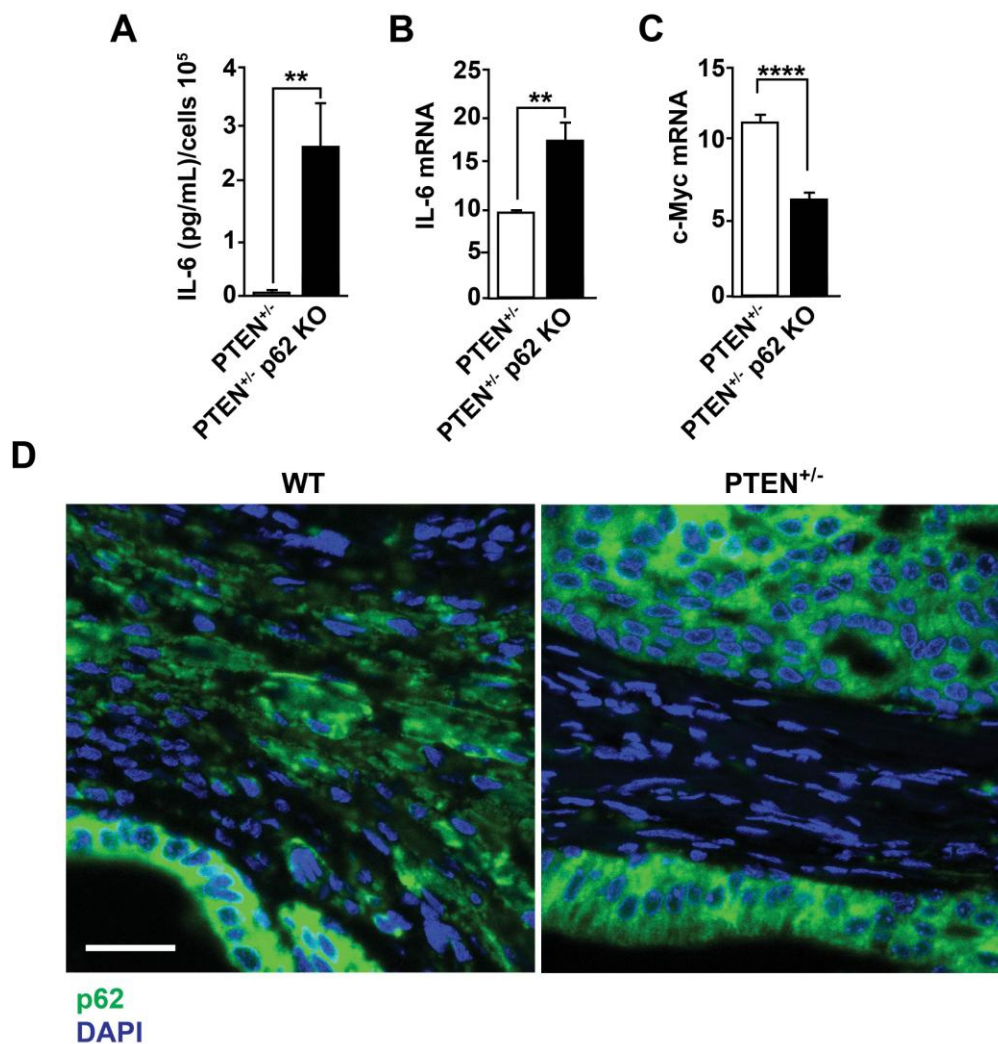

**Figure S4, related to Figure 6. p62 role in prostate stroma of PTEN<sup>+/-</sup> mice.**

(A-C) IL-6 ELISA (A) and RT-PCR of IL-6 (B) and c-Myc (C) in prostate stromal cells from PTEN<sup>+/-</sup> and PTEN<sup>+/-</sup>/p62 KO mice (n = 6). (D) p62 levels are downregulated in the prostate stroma of PTEN<sup>+/-</sup> mice. Immunostaining of p62 (green) and DAPI (blue) were performed in prostate sections of WT and PTEN<sup>+/-</sup> mice of 9 months of age (n = 4). \*\*p < 0.01, \*\*\*\*p < 0.0001. Scale bar, 25  $\mu$ m. Results are presented as means  $\pm$  SEM.

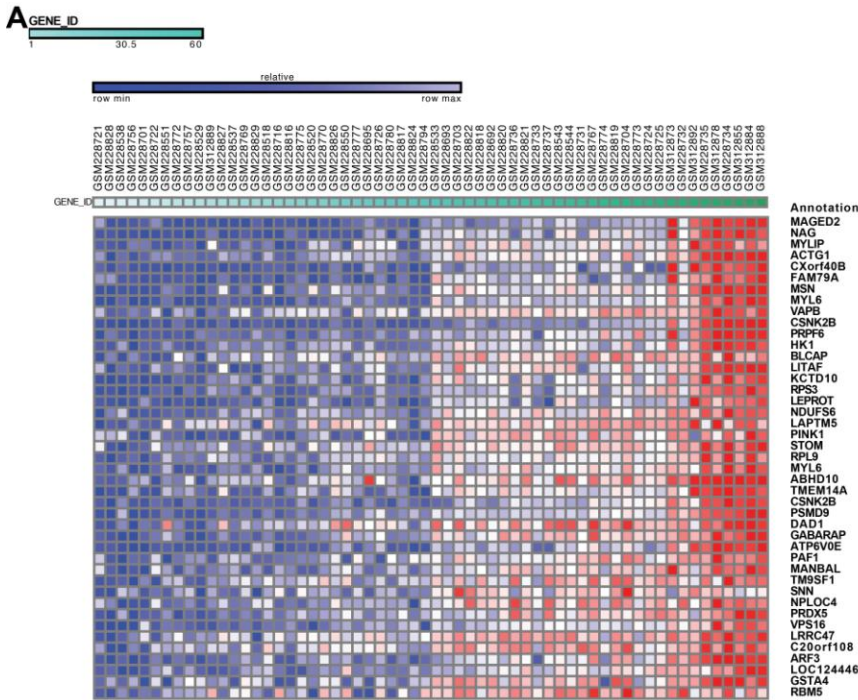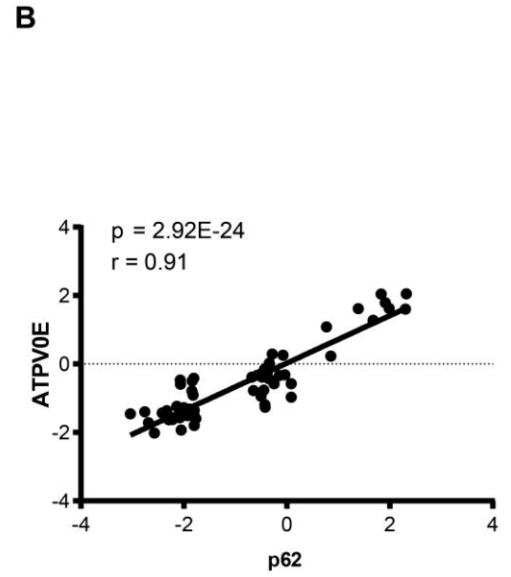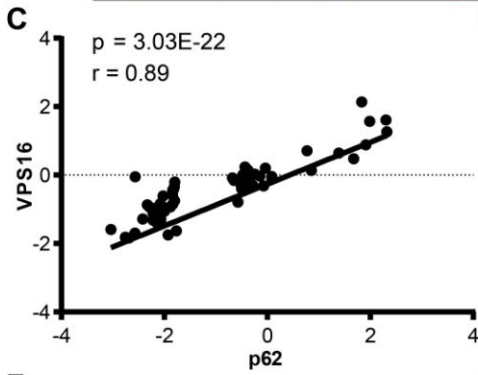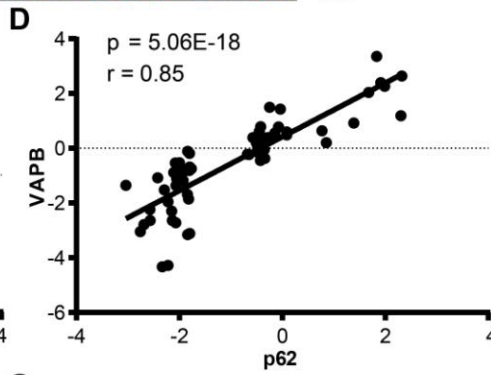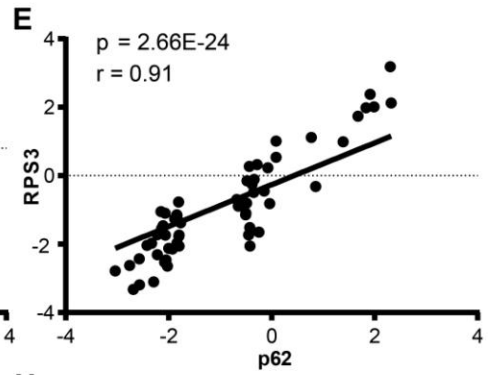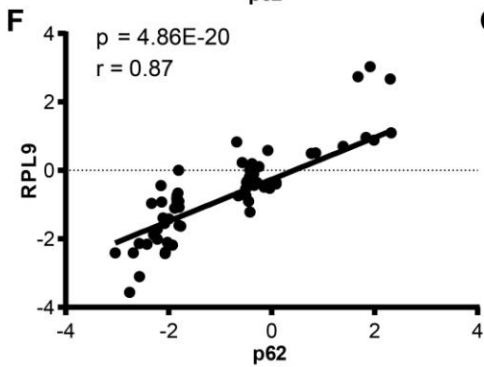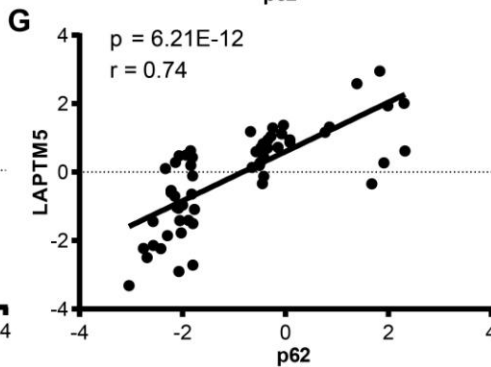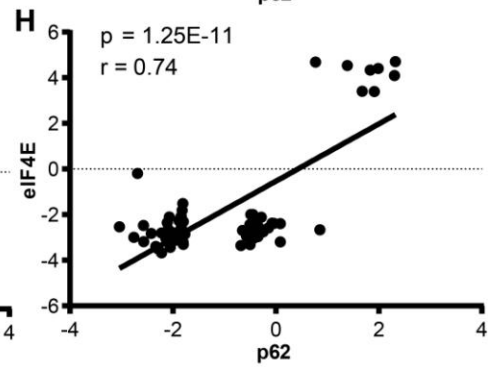

**Figure S5, Related to Figure 7. p62 signature in human stroma.**

(A) Heat map of the top 25 genes differentially expressed (FDR > 0.0002 and fold > 1.5) in the top 25% versus the bottom 25% of human stroma samples ranked by p62 expression levels. Expression data were extracted from the GSE9014 dataset. Blue and red in the heatmap indicate genes that are underexpressed or overexpressed, respectively. (B-H) A positive significant correlation of gene expression between p62 and ATPV0E (B), VPS16 (C), VAPB (D), RSP3 (E), RPL9 (F), LPTM5 (G), and eIF4E (H) is shown for human stromal samples from the GSE9014 dataset.
